# Supplementary material
Source: PubMed Central journal article supplement (PMC5360520)
Supplement: NIHMS847761-supplement-1.pdf [file NIHMS847761-supplement-1.pdf]

## **Supplementary material**

### **Local TNFR1 signaling licenses murine neutrophils for increased TLR-dependent cytokine and eicosanoid production**

Jacques Deguine\*, Jessica Wei†, Roman Barbalat\*‡, Karsten Gronert†, Gregory M. Barton\*

Supplementary table 1. Antibodies and clones used

| Antigen | Clone    | Fluorochrome | Dilution | Provider          |
|---------|----------|--------------|----------|-------------------|
| CD11b   | M1/70    | FITC         | 400      | eBiosciences      |
| CD11b   | M1/70    | V450         | 400      | Tonbo Biosciences |
| CD62L   | MEL-14   | PE           | 400      | eBiosciences      |
| Ly6C    | HK1.4    | PercP-Cy5.5  | 400      | eBiosciences      |
| Ly6G    | 1A8      | PE-Cy7       | 400      | Tonbo Biosciences |
| Ly6C/G  | RB6-8C5  | PE-Cy7       | 400      | Tonbo Biosciences |
| Ly6C/G  | RB6-8C5  | APC-Alexa780 | 400      | eBiosciences      |
| TNF     | MP6-XT22 | APC          | 300      | eBiosciences      |
| CD45.1  | A20      | e450         | 200      | eBiosciences      |
| FcBlock | 2.4G2    | Purified     | 400      | UCSF Core         |

Supplementary table 2. Primers used for qRT-PCR

| Gene  | Product size | Forward primer          | Reverse primer         | Spans  |
|-------|--------------|-------------------------|------------------------|--------|
| Actb  | 154          | GGCTGTATTCCCCTCCATCG    | CCAGTTGGTAACAATGCCATGT | Intron |
| Ccl3  | 77           | CTCCCAGCCAGGTGTCATTTT   | CTTGGACCCAGGTCTCTTTGG  | Splice |
| Ccl4  | 121          | TTCCTGCTGTTTCTTTACACCT  | CTGTCTGCCTCTTTTGGTCAG  | Intron |
| Cxcl1 | 117          | CTGGGATTCACCTCAAGAACATC | CAGGGTCAAGGCAAGCCTC    | Intron |
| Cxcl2 | 108          | CCAACCACCAGGCTACAGG     | GCGTCACACTCAAGCTCTG    | Intron |
| Gapdh | 102          | TGAAGCAGGCATCTGAGGG     | CGAAGGTGGAAGAGTGGGAG   |        |
| IL-6  | 76           | TAGTCCTTCCTACCCCAATTTCC | TTGGTCCTTAGCCACTCCTTC  | Splice |
| Il10  | 78           | GCTGGACAACATACTGCTAACC  | ATTTCCGATAAGGCTTGGCAA  | Intron |
| Rn18s | 137          | CATTCGAACGTCTGCCCTAT    | CCTGCTGCCTTCCTTGGA     |        |
| Tnf   | 148          | CCTGTAGCCCACGTCGTAG     | GGGAGTAGACAAGGTACAACCC | Intron |
